# Supplementary material
Source: Research Square preprint supplement (doi:10.21203/rs.3.rs-9658363/v1)
Supplement: Supplementary file 1 [file 05542295624a015d36cf63e5.xlsx]

## Sheet: Coordenadas
Code	Population	Department	Municipality	Locality	Lat	Lon	Year of collection
EP01	1	El Paraiso	Moroceli	Guadalajara	14.1032	-86.9179	2019
GD02	2	Gracias a Dios	Puerto Lempira	Auka	14.9419	-83.8346	2021
GD03	3	Gracias a Dios	Puerto Lempira	Suhi	14.7006	-84.3351	2021
IB04	4	Islas de la Bahia	Roatán	Sandy Bay	16.3234	-86.5717	2021
OL05	5	Olancho	Catacamas	Campus UNAH	14.8071	-85.8449	2021
YO06	6	Yoro	Santa Rita	El Negrito	15.2763	-87.7075	2021
CO07	7	Colon	Tocoa	Cayo Campo	15.6298	-86.2876	2019
CM08	8	Comayagua	Comayagua	Rancho Irene	14.4393	-87.69	2021
KK09	9	Gracias a Dios	Puerto Lempira	Kaukira	15.3091	-83.5659	2019
DP10	10	Gracias a Dios	Puerto Lempira	Dapat	15.3258	-83.6179	2021
