# Supplementary material
Source: Research Square preprint supplement (doi:10.21203/rs.3.rs-9658363/v1)
Supplement: Supplementary file 2 [file fb6c55b7c862686367dcbd0a.xlsx]

## Sheet: Allele1
Sample	Allele	2-25	1-90	2-14	6-41	0078	0086	0008	0129
EP01-01	Allele1	95	178	198	177	80	93	80	273
EP01-02	Allele1	95	178	192	177	79	88	80	274
EP01-04	Allele1	100	152	192	179	78	93	78	265
EP01-05	Allele1	97	180	196	179	77	88	77	274
EP01-06	Allele1	98	80	192	179	82	89	82	274
EP01-07	Allele1	102	157	192	177	81	89	84	273
EP01-08	Allele1	95	146	193	177	78	91	78	275
EP01-09	Allele1	95	150	193	177	75	91	82	240
EP01-10	Allele1	95	146	193	179	78	93	78	258
EP01-11	Allele1	95	147	210	179	78	89	78	275
EP01-12	Allele1	98	176	199	177	79	88	79	273
EP01-13	Allele1	102	180	199	179	77	88	77	273
EP01-14	Allele1	96	176	192	175	77	90	77	273
EP01-15	Allele1	96	178	199	177	71	92	77	273
EP01-16	Allele1	96	180	195	179	77	90	77	273
EP01-17	Allele1	96	177	192	175	77	90	77	273
EP01-18	Allele1	97	178	193	178	77	90	77	273
EP01-19	Allele1	104	178	200	180	75	88	76	273
GD02-1	Allele1	95	176	201	174	73	88	93	275
GD02-2	Allele1	102	152	195	182	77	88	77	275
GD02-3	Allele1	96	151	210	180	79	88	79	275
GD02-4	Allele1	98	151	195	177	79	88	79	275
GD02-5	Allele1	100	177	197	180	71	90	79	275
GD02-6	Allele1	102	177	196	176	71	90	79	274
GD02-7	Allele1	102	177	195	176	81	90	81	275
GD02-8	Allele1	100	150	195	180	81	91	82	275
GD02-9	Allele1	100	151	195	177	73	88	88	275
GD02-10	Allele1	100	177	201	176	77	88	77	275
GD02-11	Allele1	98	178	195	177	77	88	77	263
GD02-12	Allele1	102	177	205	175	81	88	81	274
GD02-13	Allele1	95	177	195	176	79	88	79	275
GD02-14	Allele1	95	177	195	176	79	88	88	275
GD02-15	Allele1	102	177	198	176	77	88	77	275
GD02-16	Allele1	100	180	205	180	75	88	76	275
GD02-17	Allele1	102	178	196	177	81	88	88	275
GD02-18	Allele1	102	178	193	179	81	88	82	274
GD02-19	Allele1	102	180	195	180	79	91	79	274
GD02-20	Allele1	95	178	195	177	81	88	82	275
GD03-1	Allele1	104	180	195	179	77	88	77	274
GD03-2	Allele1	93	178	195	177	77	97	78	274
GD03-3	Allele1	95	176	195	175	80	88	80	275
GD03-4	Allele1	122	177	193	175	79	92	79	273
GD03-5	Allele1	100	154	192	175	75	90	75	274
GD03-6	Allele1	110	178	193	177	77	91	78	273
GD03-7	Allele1	93	178	193	178	79	88	79	273
GD03-8	Allele1	93	178	194	177	77	88	77	237
GD03-9	Allele1	98	155	192	175	77	90	77	274
GD03-10	Allele1	95	147	196	180	77	92	77	275
GD03-11	Allele1	110	177	193	175	77	92	77	275
GD03-12	Allele1	96	178	198	177	71	91	82	273
GD03-13	Allele1	95	159	193	175	80	91	80	274
GD03-14	Allele1	98	147	193	175	79	88	79	273
GD03-15	Allele1	105	149	192	180	75	88	75	273
GD03-16	Allele1	98	153	193	180	75	88	75	273
GD03-17	Allele1	97	177	198	180	71	92	95	274
GD03-18	Allele1	95	178	192	178	75	94	76	174
GD03-19	Allele1	98	156	197	178	81	90	81	273
GD03-20	Allele1	98	164	190	175	73	90	79	275
IB04-1	Allele1	95	147	197	177	77	88	78	274
IB04-2	Allele1	95	153	195	177	75	88	75	274
IB04-3	Allele1	95	155	196	179	77	90	77	274
IB04-4	Allele1	122	179	203	178	81	92	84	275
IB04-5	Allele1	95	178	199	177	78	100	78	274
IB04-6	Allele1	95	149	192	179	78	88	78	274
IB04-7	Allele1	95	153	194	175	79	95	81	275
IB04-8	Allele1	95	164	192	174	75	100	75	274
IB04-9	Allele1	79	149	192	177	82	89	82	275
IB04-10	Allele1	95	177	194	177	81	91	76	275
IB04-11	Allele1	100	149	194	175	80	91	80	239
IB04-12	Allele1	97	174	196	275	82	98	83	239
IB04-13	Allele1	97	151	194	175	77	91	90	239
IB04-14	Allele1	108	157	192	175	78	88	78	275
IB04-15	Allele1	95	147	198	177	82	95	82	239
IB04-16	Allele1	93	153	202	178	82	96	80	274
IB04-17	Allele1	95	164	192	177	79	91	80	239
IB04-18	Allele1	97	168	194	179	77	93	93	274
IB04-19	Allele1	95	167	192	181	81	95	82	274
IB04-20	Allele1	93	180	192	181	77	91	84	274
OL05-1	Allele1	106	178	193	177	77	90	77	247
OL05-2	Allele1	102	146	195	177	77	89	77	247
OL05-3	Allele1	96	147	193	177	77	89	77	247
OL05-4	Allele1	96	155	199	179	79	88	79	274
OL05-5	Allele1	98	159	203	179	81	88	81	274
OL05-6	Allele1	96	146	201	177	83	96	83	275
OL05-7	Allele1	98	147	193	180	77	88	77	238
OL05-8	Allele1	98	180	193	179	77	90	77	274
OL05-9	Allele1	100	146	199	179	81	92	81	238
OL05-10	Allele1	96	178	193	178	77	92	77	239
OL05-11	Allele1	96	153	193	180	83	89	87	239
OL05-12	Allele1	98	178	197	177	77	88	77	239
OL05-13	Allele1	102	178	195	177	73	89	72	239
OL05-14	Allele1	96	177	193	176	81	88	81	275
OL05-15	Allele1	98	178	224	178	79	89	79	274
OL05-16	Allele1	98	178	193	179	77	88	77	239
OL05-17	Allele1	98	146	195	180	73	88	73	238
OL05-18	Allele1	112	155	223	178	81	89	81	259
YO06-1	Allele1	98	178	193	179	79	90	79	279
YO06-2	Allele1	96	174	193	179	81	88	81	275
YO06-3	Allele1	96	180	201	179	81	90	81	274
YO06-4	Allele1	98	178	197	179	77	90	93	275
YO06-5	Allele1	102	178	192	179	81	90	81	274
YO06-6	Allele1	96	178	203	175	71	90	81	275
YO06-7	Allele1	98	179	195	177	81	99	81	274
YO06-8	Allele1	96	178	195	179	77	92	77	274
YO06-9	Allele1	95	181	192	179	77	95	75	258
YO06-10	Allele1	96	180	189	178	79	90	79	274
YO06-11	Allele1	96	174	198	179	79	90	79	270
YO06-12	Allele1	96	178	199	177	83	90	83	274
YO06-13	Allele1	96	177	195	175	75	94	75	275
YO06-14	Allele1	96	147	193	179	79	90	79	275
YO06-15	Allele1	98	162	209	177	79	90	75	275
YO06-16	Allele1	96	179	223	175	77	90	77	275
YO06-17	Allele1	100	179	195	177	179	90	79	275
YO06-18	Allele1	96	153	189	177	79	88	79	275
YO06-19	Allele1	96	162	193	179	77	88	77	254
YO06-20	Allele1	96	178	193	177	81	90	81	275
CO07-1	Allele1	100	176	192	175	75	90	75	274
CO07-2	Allele1	95	178	192	177	77	90	77	274
CO07-3	Allele1	93	178	192	177	79	88	79	274
CO07-4	Allele1	93	178	195	177	77	88	77	274
CO07-5	Allele1	97	174	192	177	77	90	77	274
CO07-6	Allele1	95	178	196	179	77	92	77	274
CO07-7	Allele1	110	178	192	175	77	92	77	274
CO07-8	Allele1	95	178	199	177	71	90	81	274
CO07-9	Allele1	95	178	192	175	79	90	75	275
CO07-10	Allele1	97	174	192	175	79	88	79	274
CO07-11	Allele1	104	181	189	179	75	88	75	274
CO07-12	Allele1	97	178	192	177	75	88	75	275
CO07-13	Allele1	97	178	197	179	71	92	75	275
CO07-14	Allele1	95	178	192	177	75	90	75	274
CO07-15	Allele1	97	178	196	177	81	90	81	274
CM08-1	Allele1	95	179	198	179	80	90	80	275
CM08-2	Allele1	102	149	198	179	81	91	81	275
CM08-3	Allele1	96	147	198	177	79	91	80	274
CM08-4	Allele1	96	179	195	179	81	93	75	274
CM08-5	Allele1	96	179	192	179	71	93	74	275
CM08-6	Allele1	104	178	189	177	74	88	88	274
CM08-7	Allele1	97	178	192	177	77	92	88	275
CM08-8	Allele1	96	178	193	177	77	90	78	274
CM08-9	Allele1	98	180	198	179	71	90	90	275
CM08-10	Allele1	96	179	205	179	79	90	90	275
CM08-11	Allele1	95	179	193	179	81	91	80	274
CM08-12	Allele1	95	179	193	179	79	90	76	275
CM08-13	Allele1	95	179	193	179	79	90	76	275
CM08-14	Allele1	95	151	195	177	75	90	80	275
CM08-15	Allele1	100	179	195	179	77	88	80	275
CM08-16	Allele1	96	179	197	179	79	88	80	275
CM08-17	Allele1	95	176	192	177	79	91	80	274
CM08-18	Allele1	95	178	192	177	79	91	79	250
CM08-19	Allele1	98	178	194	179	79	93	79	274
CM08-20	Allele1	95	178	194	179	79	88	79	274
KK09-1	Allele1	104	180	195	179	81	90	81	273
KK09-2	Allele1	97	178	202	177	81	88	81	273
KK09-3	Allele1	95	176	205	175	71	90	85	275
KK09-4	Allele1	95	180	196	179	81	90	81	273
KK09-5	Allele1	97	180	195	179	71	90	81	273
KK09-6	Allele1	95	176	195	175	79	90	79	273
KK09-7	Allele1	97	180	195	179	81	90	81	273
KK09-8	Allele1	95	178	192	177	77	88	77	273
KK09-9	Allele1	95	180	196	175	79	88	79	278
KK09-10	Allele1	97	176	195	175	79	88	79	273
KK09-11	Allele1	97	180	195	179	79	88	79	273
KK09-12	Allele1	97	175	205	177	81	90	81	275
KK09-13	Allele1	97	180	205	177	81	88	81	273
KK09-14	Allele1	97	178	196	177	81	88	81	275
KK09-15	Allele1	95	178	175	177	79	88	79	273
KK09-16	Allele1	95	178	195	181	79	88	79	273
KK09-17	Allele1	97	178	195	177	81	88	81	273
DP10-1	Allele1	98	178	196	177	82	89	82	274
DP10-2	Allele1	100	151	195	177	75	88	75	274
DP10-3	Allele1	98	160	198	179	71	88	79	274
DP10-4	Allele1	93	178	197	177	79	92	80	274
DP10-5	Allele1	96	177	200	179	79	88	80	274
DP10-6	Allele1	102	172	196	177	77	88	77	274
DP10-7	Allele1	102	172	204	179	75	88	75	274
DP10-8	Allele1	102	179	192	181	79	93	79	274

## Sheet: Allele2
Sample	Allele2	2-25	1-90	2-14	6-41	0078	0086	0008	0129
EP01-01	Allele2	97	178	198	179	80	93	80	275
EP01-02	Allele2	102	178	195	177	79	88	88	274
EP01-04	Allele2	104	152	192	179	82	93	82	265
EP01-05	Allele2	97	180	196	181	80	91	80	274
EP01-06	Allele2	98	80	192	181	82	91	86	274
EP01-07	Allele2	102	157	192	179	81	95	84	273
EP01-08	Allele2	95	146	193	179	78	91	78	275
EP01-09	Allele2	104	154	193	179	82	91	82	240
EP01-10	Allele2	95	146	193	181	78	93	78	275
EP01-11	Allele2	98	147	210	179	78	93	84	275
EP01-12	Allele2	100	176	199	177	79	88	79	273
EP01-13	Allele2	106	188	199	181	81	88	81	273
EP01-14	Allele2	100	176	192	177	81	92	81	273
EP01-15	Allele2	100	178	199	179	77	92	77	273
EP01-16	Allele2	110	180	195	181	81	90	81	273
EP01-17	Allele2	96	177	192	175	81	92	81	273
EP01-18	Allele2	97	178	199	180	77	92	77	273
EP01-19	Allele2	104	178	200	180	83	90	83	273
GD02-1	Allele2	102	176	201	277	77	93	77	275
GD02-2	Allele2	102	152	195	182	77	90	88	275
GD02-3	Allele2	102	151	210	180	81	90	81	275
GD02-4	Allele2	98	151	205	177	81	88	81	275
GD02-5	Allele2	100	178	197	180	79	90	79	275
GD02-6	Allele2	102	178	196	179	79	90	90	274
GD02-7	Allele2	104	177	195	176	81	90	81	275
GD02-8	Allele2	102	150	195	180	81	91	82	275
GD02-9	Allele2	104	151	195	177	73	90	88	275
GD02-10	Allele2	127	177	201	176	77	90	77	275
GD02-11	Allele2	100	178	195	180	77	90	85	263
GD02-12	Allele2	102	177	205	175	83	88	84	274
GD02-13	Allele2	95	177	195	178	81	88	81	275
GD02-14	Allele2	102	177	195	178	79	90	88	275
GD02-15	Allele2	102	177	198	178	79	90	79	275
GD02-16	Allele2	102	180	205	182	81	88	81	275
GD02-17	Allele2	102	178	195	177	81	88	88	274
GD02-18	Allele2	102	178	193	179	81	88	88	274
GD02-19	Allele2	102	180	195	182	81	91	82	275
GD02-20	Allele2	100	178	195	182	83	91	83	275
GD03-1	Allele2	104	180	196	181	81	97	77	274
GD03-2	Allele2	93	178	195	179	77	97	78	274
GD03-3	Allele2	95	176	195	177	80	100	88	275
GD03-4	Allele2	122	177	193	177	79	92	86	273
GD03-5	Allele2	112	154	201	177	75	90	100	274
GD03-6	Allele2	110	178	192	179	77	95	78	273
GD03-7	Allele2	93	178	197	180	81	90	82	273
GD03-8	Allele2	93	178	194	184	77	88	77	273
GD03-9	Allele2	102	155	192	184	80	90	80	274
GD03-10	Allele2	100	147	196	180	77	92	85	275
GD03-11	Allele2	110	178	195	180	81	92	82	275
GD03-12	Allele2	102	178	198	180	81	91	82	273
GD03-13	Allele2	95	162	193	175	81	91	81	274
GD03-14	Allele2	98	147	197	184	79	88	79	273
GD03-15	Allele2	105	149	195	184	79	90	79	275
GD03-16	Allele2	100	153	193	177	75	88	75	273
GD03-17	Allele2	100	154	205	180	75	92	95	274
GD03-18	Allele2	95	178	197	180	75	100	86	174
GD03-19	Allele2	106	162	197	180	81	90	86	273
GD03-20	Allele2	100	168	202	177	79	90	79	275
IB04-1	Allele2	97	149	204	177	79	93	80	274
IB04-2	Allele2	95	153	195	177	82	88	82	274
IB04-3	Allele2	97	155	203	181	77	90	77	274
IB04-4	Allele2	128	179	206	178	81	92	84	275
IB04-5	Allele2	95	178	199	179	79	100	80	274
IB04-6	Allele2	95	149	194	181	81	88	82	274
IB04-7	Allele2	108	153	194	179	79	95	81	275
IB04-8	Allele2	108	164	192	177	78	100	78	274
IB04-9	Allele2	79	153	194	179	82	95	84	275
IB04-10	Allele2	95	177	194	179	81	91	80	275
IB04-11	Allele2	100	149	201	177	82	95	82	239
IB04-12	Allele2	108	174	198	275	82	100	84	275
IB04-13	Allele2	102	151	196	179	77	91	90	275
IB04-14	Allele2	108	170	196	179	81	91	82	275
IB04-15	Allele2	95	147	200	179	82	95	84	274
IB04-16	Allele2	93	153	202	178	82	96	82	274
IB04-17	Allele2	97	276	194	177	79	91	86	274
IB04-18	Allele2	97	176	194	179	77	93	93	274
IB04-19	Allele2	95	167	198	181	81	95	95	274
IB04-20	Allele2	108	180	192	181	82	91	91	274
OL05-1	Allele2	110	178	193	179	81	92	81	247
OL05-2	Allele2	104	178	201	179	81	89	81	247
OL05-3	Allele2	110	178	197	179	79	92	79	247
OL05-4	Allele2	102	155	199	179	81	89	81	274
OL05-5	Allele2	98	161	203	179	83	88	83	274
OL05-6	Allele2	112	157	203	177	83	96	85	275
OL05-7	Allele2	98	181	201	181	81	90	81	238
OL05-8	Allele2	110	180	202	181	77	90	77	274
OL05-9	Allele2	104	153	199	179	81	92	81	275
OL05-10	Allele2	104	178	201	179	77	92	87	275
OL05-11	Allele2	102	180	193	182	83	89	89	275
OL05-12	Allele2	98	178	203	179	77	88	85	275
OL05-13	Allele2	102	178	195	179	79	89	72	274
OL05-14	Allele2	102	178	199	179	81	88	88	275
OL05-15	Allele2	100	178	224	179	79	92	79	274
OL05-16	Allele2	98	178	201	179	77	90	77	275
OL05-17	Allele2	98	149	195	180	79	90	79	275
OL05-18	Allele2	112	155	223	185	83	89	102	273
YO06-1	Allele2	108	178	193	179	81	92	81	279
YO06-2	Allele2	96	174	193	179	83	88	83	275
YO06-3	Allele2	96	180	201	181	81	90	85	274
YO06-4	Allele2	98	178	197	179	81	92	93	275
YO06-5	Allele2	102	178	192	179	83	90	83	274
YO06-6	Allele2	98	178	203	179	81	90	93	275
YO06-7	Allele2	100	179	195	180	81	99	93	274
YO06-8	Allele2	96	178	195	179	77	99	77	274
YO06-9	Allele2	102	181	192	183	79	95	79	258
YO06-10	Allele2	104	180	189	182	79	90	79	274
YO06-11	Allele2	96	174	198	179	81	94	81	270
YO06-12	Allele2	106	178	199	179	83	90	83	274
YO06-13	Allele2	96	178	195	179	81	94	81	275
YO06-14	Allele2	100	147	193	179	81	90	81	275
YO06-15	Allele2	100	168	209	177	83	94	79	275
YO06-16	Allele2	98	179	223	177	79	90	79	275
YO06-17	Allele2	108	179	195	180	81	94	81	275
YO06-18	Allele2	96	153	189	183	81	92	81	275
YO06-19	Allele2	96	178	193	179	83	90	83	275
YO06-20	Allele2	100	178	195	179	83	90	83	275
CO07-1	Allele2	112	176	200	177	75	90	75	274
CO07-2	Allele2	110	178	192	177	77	94	77	274
CO07-3	Allele2	93	178	196	179	81	90	81	274
CO07-4	Allele2	93	178	195	183	77	88	77	274
CO07-5	Allele2	102	174	192	177	79	90	79	274
CO07-6	Allele2	100	178	196	179	77	92	85	274
CO07-7	Allele2	110	178	195	179	81	92	81	274
CO07-8	Allele2	102	178	199	179	81	90	86	274
CO07-9	Allele2	95	178	192	177	81	90	75	275
CO07-10	Allele2	97	178	196	183	79	88	79	274
CO07-11	Allele2	104	181	209	184	79	90	79	274
CO07-12	Allele2	100	178	192	179	75	90	75	275
CO07-13	Allele2	100	178	205	179	75	92	75	275
CO07-14	Allele2	95	178	196	179	75	90	86	274
CO07-15	Allele2	106	178	196	179	81	90	85	274
CM08-1	Allele2	100	179	198	179	80	95	80	275
CM08-2	Allele2	104	178	198	179	81	91	84	275
CM08-3	Allele2	100	178	198	179	79	93	80	274
CM08-4	Allele2	96	179	217	179	81	99	75	274
CM08-5	Allele2	104	179	195	179	79	93	93	275
CM08-6	Allele2	104	181	189	179	79	90	90	274
CM08-7	Allele2	100	178	192	179	79	92	88	275
CM08-8	Allele2	104	178	196	179	77	93	78	274
CM08-9	Allele2	98	180	198	183	71	93	93	275
CM08-10	Allele2	96	179	205	179	81	90	90	275
CM08-11	Allele2	95	179	193	179	81	91	80	275
CM08-12	Allele2	100	179	210	179	81	90	76	275
CM08-13	Allele2	98	179	193	179	81	90	76	275
CM08-14	Allele2	95	178	195	179	77	93	80	275
CM08-15	Allele2	102	179	195	179	81	90	80	275
CM08-16	Allele2	100	179	211	179	79	95	80	275
CM08-17	Allele2	97	176	192	177	81	91	81	274
CM08-18	Allele2	100	178	192	179	79	95	80	274
CM08-19	Allele2	98	178	194	179	81	93	81	274
CM08-20	Allele2	100	178	200	179	81	88	79	274
KK09-1	Allele2	104	180	201	181	81	99	85	274
KK09-2	Allele2	104	178	202	179	81	90	81	273
KK09-3	Allele2	102	176	205	177	83	90	90	275
KK09-4	Allele2	95	180	196	181	81	90	81	273
KK09-5	Allele2	97	180	195	181	81	90	85	273
KK09-6	Allele2	95	176	195	177	81	92	81	273
KK09-7	Allele2	102	180	195	179	81	98	81	273
KK09-8	Allele2	100	178	192	177	79	90	79	273
KK09-9	Allele2	95	180	196	175	79	98	85	278
KK09-10	Allele2	97	176	195	177	79	88	88	273
KK09-11	Allele2	98	180	195	181	81	90	81	273
KK09-12	Allele2	98	175	205	177	81	98	81	275
KK09-13	Allele2	98	180	205	177	81	90	81	273
KK09-14	Allele2	97	178	196	177	81	98	81	275
KK09-15	Allele2	96	178	175	181	81	90	81	273
KK09-16	Allele2	97	178	195	181	79	90	79	273
KK09-17	Allele2	97	178	195	179	81	88	88	273
DP01-1	Allele2	98	179	196	181	82	91	82	274
DP01-2	Allele2	102	178	195	181	79	90	79	274
DP01-3	Allele2	108	160	198	179	79	89	79	274
DP01-4	Allele2	100	179	197	181	81	92	81	274
DP01-5	Allele2	102	177	200	179	79	91	80	274
DP01-6	Allele2	102	174	196	177	77	88	88	274
DP01-7	Allele2	102	172	204	179	75	88	88	102
DP01-8	Allele2	102	179	194	181	79	95	79	274

## Sheet: Database
Locality	Sample	2-25_A1	2-25_A2	1-90_A1	1-90_A2	2-14_A1	2-14_A2	6-41_A1	6-41_A2	0078_A1	0078_A2	0086_A1	0086_A2	0008_A1	0008_A2	0129_A1	0129_A2
EP01	EP01-01	95	97	178	178	198	198	177	179	80	80	93	93	80	80	273	275
EP01	EP01-02	95	102	178	178	192	195	177	177	79	79	88	88	80	88	274	274
EP01	EP01-04	100	104	152	152	192	192	179	179	78	82	93	93	78	82	265	265
EP01	EP01-05	97	97	180	180	196	196	179	181	77	80	88	91	77	80	274	274
EP01	EP01-06	98	98	80	80	192	192	179	181	82	82	89	91	82	86	274	274
EP01	EP01-07	102	102	157	157	192	192	177	179	81	81	89	95	84	84	273	273
EP01	EP01-08	95	95	146	146	193	193	177	179	78	78	91	91	78	78	275	275
EP01	EP01-09	95	104	150	154	193	193	177	179	75	82	91	91	82	82	240	240
EP01	EP01-10	95	95	146	146	193	193	179	181	78	78	93	93	78	78	258	275
EP01	EP01-11	95	98	147	147	210	210	179	179	78	78	89	93	78	84	275	275
EP01	EP01-12	98	100	176	176	199	199	177	177	79	79	88	88	79	79	273	273
EP01	EP01-13	102	106	180	188	199	199	179	181	77	81	88	88	77	81	273	273
EP01	EP01-14	96	100	176	176	192	192	175	177	77	81	90	92	77	81	273	273
EP01	EP01-15	96	100	178	178	199	199	177	179	71	77	92	92	77	77	273	273
EP01	EP01-16	96	110	180	180	195	195	179	181	77	81	90	90	77	81	273	273
EP01	EP01-17	96	96	177	177	192	192	175	175	77	81	90	92	77	81	273	273
EP01	EP01-18	97	97	178	178	193	199	178	180	77	77	90	92	77	77	273	273
EP01	EP01-19	104	104	178	178	200	200	180	180	75	83	88	90	76	83	273	273
GD02	GD02-1	95	102	176	176	201	201	174	277	73	77	88	93	93	77	275	275
GD02	GD02-2	102	102	152	152	195	195	182	182	77	77	88	90	77	88	275	275
GD02	GD02-3	96	102	151	151	210	210	180	180	79	81	88	90	79	81	275	275
GD02	GD02-4	98	98	151	151	195	205	177	177	79	81	88	88	79	81	275	275
GD02	GD02-5	100	100	177	178	197	197	180	180	71	79	90	90	79	79	275	275
GD02	GD02-6	102	102	177	178	196	196	176	179	71	79	90	90	79	90	274	274
GD02	GD02-7	102	104	177	177	195	195	176	176	81	81	90	90	81	81	275	275
GD02	GD02-8	100	102	150	150	195	195	180	180	81	81	91	91	82	82	275	275
GD02	GD02-9	100	104	151	151	195	195	177	177	73	73	88	90	88	88	275	275
GD02	GD02-10	100	127	177	177	201	201	176	176	77	77	88	90	77	77	275	275
GD02	GD02-11	98	100	178	178	195	195	177	180	77	77	88	90	77	85	263	263
GD02	GD02-12	102	102	177	177	205	205	175	175	81	83	88	88	81	84	274	274
GD02	GD02-13	95	95	177	177	195	195	176	178	79	81	88	88	79	81	275	275
GD02	GD02-14	95	102	177	177	195	195	176	178	79	79	88	90	88	88	275	275
GD02	GD02-15	102	102	177	177	198	198	176	178	77	79	88	90	77	79	275	275
GD02	GD02-16	100	102	180	180	205	205	180	182	75	81	88	88	76	81	275	275
GD02	GD02-17	102	102	178	178	196	195	177	177	81	81	88	88	88	88	275	274
GD02	GD02-18	102	102	178	178	193	193	179	179	81	81	88	88	82	88	274	274
GD02	GD02-19	102	102	180	180	195	195	180	182	79	81	91	91	79	82	274	275
GD02	GD02-20	95	100	178	178	195	195	177	182	81	83	88	91	82	83	275	275
GD03	GD03-1	104	104	180	180	195	196	179	181	77	81	88	97	77	77	274	274
GD03	GD03-2	93	93	178	178	195	195	177	179	77	77	97	97	78	78	274	274
GD03	GD03-3	95	95	176	176	195	195	175	177	80	80	88	100	80	88	275	275
GD03	GD03-4	122	122	177	177	193	193	175	177	79	79	92	92	79	86	273	273
GD03	GD03-5	100	112	154	154	192	201	175	177	75	75	90	90	75	100	274	274
GD03	GD03-6	110	110	178	178	193	192	177	179	77	77	91	95	78	78	273	273
GD03	GD03-7	93	93	178	178	193	197	178	180	79	81	88	90	79	82	273	273
GD03	GD03-8	93	93	178	178	194	194	177	184	77	77	88	88	77	77	237	273
GD03	GD03-9	98	102	155	155	192	192	175	184	77	80	90	90	77	80	274	274
GD03	GD03-10	95	100	147	147	196	196	180	180	77	77	92	92	77	85	275	275
GD03	GD03-11	110	110	177	178	193	195	175	180	77	81	92	92	77	82	275	275
GD03	GD03-12	96	102	178	178	198	198	177	180	71	81	91	91	82	82	273	273
GD03	GD03-13	95	95	159	162	193	193	175	175	80	81	91	91	80	81	274	274
GD03	GD03-14	98	98	147	147	193	197	175	184	79	79	88	88	79	79	273	273
GD03	GD03-15	105	105	149	149	192	195	180	184	75	79	88	90	75	79	273	275
GD03	GD03-16	98	100	153	153	193	193	180	177	75	75	88	88	75	75	273	273
GD03	GD03-17	97	100	177	154	198	205	180	180	71	75	92	92	95	95	274	274
GD03	GD03-18	95	95	178	178	192	197	178	180	75	75	94	100	76	86	174	174
GD03	GD03-19	98	106	156	162	197	197	178	180	81	81	90	90	81	86	273	273
GD03	GD03-20	98	100	164	168	190	202	175	177	73	79	90	90	79	79	275	275
IB04	IB04-1	95	97	147	149	197	204	177	177	77	79	88	93	78	80	274	274
IB04	IB04-2	95	95	153	153	195	195	177	177	75	82	88	88	75	82	274	274
IB04	IB04-3	95	97	155	155	196	203	179	181	77	77	90	90	77	77	274	274
IB04	IB04-4	122	128	179	179	203	206	178	178	81	81	92	92	84	84	275	275
IB04	IB04-5	95	95	178	178	199	199	177	179	78	79	100	100	78	80	274	274
IB04	IB04-6	95	95	149	149	192	194	179	181	78	81	88	88	78	82	274	274
IB04	IB04-7	95	108	153	153	194	194	175	179	79	79	95	95	81	81	275	275
IB04	IB04-8	95	108	164	164	192	192	174	177	75	78	100	100	75	78	274	274
IB04	IB04-9	79	79	149	153	192	194	177	179	82	82	89	95	82	84	275	275
IB04	IB04-10	95	95	177	177	194	194	177	179	81	81	91	91	76	80	275	275
IB04	IB04-11	100	100	149	149	194	201	175	177	80	82	91	95	80	82	239	239
IB04	IB04-12	97	108	174	174	196	198	275	275	82	82	98	100	83	84	239	275
IB04	IB04-13	97	102	151	151	194	196	175	179	77	77	91	91	90	90	239	275
IB04	IB04-14	108	108	157	170	192	196	175	179	78	81	88	91	78	82	275	275
IB04	IB04-15	95	95	147	147	198	200	177	179	82	82	95	95	82	84	239	274
IB04	IB04-16	93	93	153	153	202	202	178	178	82	82	96	96	80	82	274	274
IB04	IB04-17	95	97	164	276	192	194	177	177	79	79	91	91	80	86	239	274
IB04	IB04-18	97	97	168	176	194	194	179	179	77	77	93	93	93	93	274	274
IB04	IB04-19	95	95	167	167	192	198	181	181	81	81	95	95	82	95	274	274
IB04	IB04-20	93	108	180	180	192	192	181	181	77	82	91	91	84	91	274	274
OL05	OL05-1	106	110	178	178	193	193	177	179	77	81	90	92	77	81	247	247
OL05	OL05-2	102	104	146	178	195	201	177	179	77	81	89	89	77	81	247	247
OL05	OL05-3	96	110	147	178	193	197	177	179	77	79	89	92	77	79	247	247
OL05	OL05-4	96	102	155	155	199	199	179	179	79	81	88	89	79	81	274	274
OL05	OL05-5	98	98	159	161	203	203	179	179	81	83	88	88	81	83	274	274
OL05	OL05-6	96	112	146	157	201	203	177	177	83	83	96	96	83	85	275	275
OL05	OL05-7	98	98	147	181	193	201	180	181	77	81	88	90	77	81	238	238
OL05	OL05-8	98	110	180	180	193	202	179	181	77	77	90	90	77	77	274	274
OL05	OL05-9	100	104	146	153	199	199	179	179	81	81	92	92	81	81	238	275
OL05	OL05-10	96	104	178	178	193	201	178	179	77	77	92	92	77	87	239	275
OL05	OL05-11	96	102	153	180	193	193	180	182	83	83	89	89	87	89	239	275
OL05	OL05-12	98	98	178	178	197	203	177	179	77	77	88	88	77	85	239	275
OL05	OL05-13	102	102	178	178	195	195	177	179	73	79	89	89	72	72	239	274
OL05	OL05-14	96	102	177	178	193	199	176	179	81	81	88	88	81	88	275	275
OL05	OL05-15	98	100	178	178	224	224	178	179	79	79	89	92	79	79	274	274
OL05	OL05-16	98	98	178	178	193	201	179	179	77	77	88	90	77	77	239	275
OL05	OL05-17	98	98	146	149	195	195	180	180	73	79	88	90	73	79	238	275
OL05	OL05-18	112	112	155	155	223	223	178	185	81	83	89	89	81	102	259	273
YO06	YO06-1	98	108	178	178	193	193	179	179	79	81	90	92	79	81	279	279
YO06	YO06-2	96	96	174	174	193	193	179	179	81	83	88	88	81	83	275	275
YO06	YO06-3	96	96	180	180	201	201	179	181	81	81	90	90	81	85	274	274
YO06	YO06-4	98	98	178	178	197	197	179	179	77	81	90	92	93	93	275	275
YO06	YO06-5	102	102	178	178	192	192	179	179	81	83	90	90	81	83	274	274
YO06	YO06-6	96	98	178	178	203	203	175	179	71	81	90	90	81	93	275	275
YO06	YO06-7	98	100	179	179	195	195	177	180	81	81	99	99	81	93	274	274
YO06	YO06-8	96	96	178	178	195	195	179	179	77	77	92	99	77	77	274	274
YO06	YO06-9	95	102	181	181	192	192	179	183	77	79	95	95	75	79	258	258
YO06	YO06-10	96	104	180	180	189	189	178	182	79	79	90	90	79	79	274	274
YO06	YO06-11	96	96	174	174	198	198	179	179	79	81	90	94	79	81	270	270
YO06	YO06-12	96	106	178	178	199	199	177	179	83	83	90	90	83	83	274	274
YO06	YO06-13	96	96	177	178	195	195	175	179	75	81	94	94	75	81	275	275
YO06	YO06-14	96	100	147	147	193	193	179	179	79	81	90	90	79	81	275	275
YO06	YO06-15	98	100	162	168	209	209	177	177	79	83	90	94	75	79	275	275
YO06	YO06-16	96	98	179	179	223	223	175	177	77	79	90	90	77	79	275	275
YO06	YO06-17	100	108	179	179	195	195	177	180	179	81	90	94	79	81	275	275
YO06	YO06-18	96	96	153	153	189	189	177	183	79	81	88	92	79	81	275	275
YO06	YO06-19	96	96	162	178	193	193	179	179	77	83	88	90	77	83	254	275
YO06	YO06-20	96	100	178	178	193	195	177	179	81	83	90	90	81	83	275	275
CO07	CO07-1	100	112	176	176	192	200	175	177	75	75	90	90	75	75	274	274
CO07	CO07-2	95	110	178	178	192	192	177	177	77	77	90	94	77	77	274	274
CO07	CO07-3	93	93	178	178	192	196	177	179	79	81	88	90	79	81	274	274
CO07	CO07-4	93	93	178	178	195	195	177	183	77	77	88	88	77	77	274	274
CO07	CO07-5	97	102	174	174	192	192	177	177	77	79	90	90	77	79	274	274
CO07	CO07-6	95	100	178	178	196	196	179	179	77	77	92	92	77	85	274	274
CO07	CO07-7	110	110	178	178	192	195	175	179	77	81	92	92	77	81	274	274
CO07	CO07-8	95	102	178	178	199	199	177	179	71	81	90	90	81	86	274	274
CO07	CO07-9	95	95	178	178	192	192	175	177	79	81	90	90	75	75	275	275
CO07	CO07-10	97	97	174	178	192	196	175	183	79	79	88	88	79	79	274	274
CO07	CO07-11	104	104	181	181	189	209	179	184	75	79	88	90	75	79	274	274
CO07	CO07-12	97	100	178	178	192	192	177	179	75	75	88	90	75	75	275	275
CO07	CO07-13	97	100	178	178	197	205	179	179	71	75	92	92	75	75	275	275
CO07	CO07-14	95	95	178	178	192	196	177	179	75	75	90	90	75	86	274	274
CO07	CO07-15	97	106	178	178	196	196	177	179	81	81	90	90	81	85	274	274
CM08	CM08-1	95	100	179	179	198	198	179	179	80	80	90	95	80	80	275	275
CM08	CM08-2	102	104	149	178	198	198	179	179	81	81	91	91	81	84	275	275
CM08	CM08-3	96	100	147	178	198	198	177	179	79	79	91	93	80	80	274	274
CM08	CM08-4	96	96	179	179	195	217	179	179	81	81	93	99	75	75	274	274
CM08	CM08-5	96	104	179	179	192	195	179	179	71	79	93	93	74	93	275	275
CM08	CM08-6	104	104	178	181	189	189	177	179	74	79	88	90	88	90	274	274
CM08	CM08-7	97	100	178	178	192	192	177	179	77	79	92	92	88	88	275	275
CM08	CM08-8	96	104	178	178	193	196	177	179	77	77	90	93	78	78	274	274
CM08	CM08-9	98	98	180	180	198	198	179	183	71	71	90	93	90	93	275	275
CM08	CM08-10	96	96	179	179	205	205	179	179	79	81	90	90	90	90	275	275
CM08	CM08-11	95	95	179	179	193	193	179	179	81	81	91	91	80	80	274	275
CM08	CM08-12	95	100	179	179	193	210	179	179	79	81	90	90	76	76	275	275
CM08	CM08-13	95	98	179	179	193	193	179	179	79	81	90	90	76	76	275	275
CM08	CM08-14	95	95	151	178	195	195	177	179	75	77	90	93	80	80	275	275
CM08	CM08-15	100	102	179	179	195	195	179	179	77	81	88	90	80	80	275	275
CM08	CM08-16	96	100	179	179	197	211	179	179	79	79	88	95	80	80	275	275
CM08	CM08-17	95	97	176	176	192	192	177	177	79	81	91	91	80	81	274	274
CM08	CM08-18	95	100	178	178	192	192	177	179	79	79	91	95	79	80	250	274
CM08	CM08-19	98	98	178	178	194	194	179	179	79	81	93	93	79	81	274	274
CM08	CM08-20	95	100	178	178	194	200	179	179	79	81	88	88	79	79	274	274
KK09	KK09-1	104	104	180	180	195	201	179	181	81	81	90	99	81	85	273	274
KK09	KK09-2	97	104	178	178	202	202	177	179	81	81	88	90	81	81	273	273
KK09	KK09-3	95	102	176	176	205	205	175	177	71	83	90	90	85	90	275	275
KK09	KK09-4	95	95	180	180	196	196	179	181	81	81	90	90	81	81	273	273
KK09	KK09-5	97	97	180	180	195	195	179	181	71	81	90	90	81	85	273	273
KK09	KK09-6	95	95	176	176	195	195	175	177	79	81	90	92	79	81	273	273
KK09	KK09-7	97	102	180	180	195	195	179	179	81	81	90	98	81	81	273	273
KK09	KK09-8	95	100	178	178	192	192	177	177	77	79	88	90	77	79	273	273
KK09	KK09-9	95	95	180	180	196	196	175	175	79	79	88	98	79	85	278	278
KK09	KK09-10	97	97	176	176	195	195	175	177	79	79	88	88	79	88	273	273
KK09	KK09-11	97	98	180	180	195	195	179	181	79	81	88	90	79	81	273	273
KK09	KK09-12	97	98	175	175	205	205	177	177	81	81	90	98	81	81	275	275
KK09	KK09-13	97	98	180	180	205	205	177	177	81	81	88	90	81	81	273	273
KK09	KK09-14	97	97	178	178	196	196	177	177	81	81	88	98	81	81	275	275
KK09	KK09-15	95	96	178	178	175	175	177	181	79	81	88	90	79	81	273	273
KK09	KK09-16	95	97	178	178	195	195	181	181	79	79	88	90	79	79	273	273
KK09	KK09-17	97	97	178	178	195	195	177	179	81	81	88	88	81	88	273	273
DP10	DP10-1	98	98	178	179	196	196	177	181	82	82	89	91	82	82	274	274
DP10	DP10-2	100	102	151	178	195	195	177	181	75	79	88	90	75	79	274	274
DP10	DP10-3	98	108	160	160	198	198	179	179	71	79	88	89	79	79	274	274
DP10	DP10-4	93	100	178	179	197	197	177	181	79	81	92	92	80	81	274	274
DP10	DP10-5	96	102	177	177	200	200	179	179	79	79	88	91	80	80	274	274
DP10	DP10-6	102	102	172	174	196	196	177	177	77	77	88	88	77	88	274	274
DP10	DP10-7	102	102	172	172	204	204	179	179	75	75	88	88	75	88	274	102
DP10	DP10-8	102	102	179	179	192	194	181	181	79	79	93	95	79	79	274	274
